# Supplementary material
Source: HighWire-hosted journal article supplement (https://erj.ersjournals.com/content/56/2/2000724)
Supplement: inline-supplementary-material-1 [file inline-supplementary-material-1.pdf]

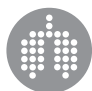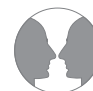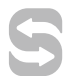

SHAREABLE PDF

# Safety and diagnostic efficacy of cone beam computed tomography-guided transbronchial cryobiopsy for interstitial lung disease: a cohort study

Guowu Zhou<sup>1</sup>, Yanhong Ren<sup>1</sup>, Jun Li<sup>1</sup>, Ting Yang<sup>1</sup>, Nan Su<sup>1</sup>, Ling Zhao<sup>2</sup>,  
Dan Wang<sup>1</sup>, Ying Li<sup>1</sup>, Zheng Tian<sup>1</sup>, Ruihong Liu<sup>1</sup>, Huaping Dai<sup>1</sup> and  
Chen Wang<sup>1,3</sup>

**Affiliations:** <sup>1</sup>Dept of Pulmonary and Critical Care Medicine, Center of Respiratory Medicine, China-Japan Friendship Hospital; National Clinical Research Center for Respiratory Diseases; Institute of Respiratory Medicine, Chinese Academy of Medical Sciences, Beijing, China. <sup>2</sup>Dept of Pathology, China-Japan Friendship Hospital, Beijing, China. <sup>3</sup>Chinese Academy of Medical Sciences, Peking Union Medical College, Beijing, China.

**Correspondence:** Huaping Dai, Dept of Pulmonary and Critical Care Medicine, Center of Respiratory Medicine, China-Japan Friendship Hospital, 2 Yinghuayuan East Street, Chaoyang District, Beijing 100029, China. E-mail: daihuaping@ccmu.edu.cn

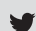

@ERSpublications

**Cone beam CT (CBCT) can provide 3-dimensional images enabling accurate positioning of cryoprobe. CBCT-guided transbronchial cryobiopsy had a favourable safety profile with low risks of pneumothorax and significant bleeding, with excellent diagnostic yield.** <https://bit.ly/2WF0SPF>

**Cite this article as:** Zhou G, Ren Y, Li J, *et al.* Safety and diagnostic efficacy of cone beam computed tomography-guided transbronchial cryobiopsy for interstitial lung disease: a cohort study. *Eur Respir J* 2020; 56: 2000724 [<https://doi.org/10.1183/13993003.00724-2020>].

This single-page version can be shared freely online.

## To the Editor:

Transbronchial cryobiopsy (TBCB) is one of the most important procedures for assessment of patients with suspected interstitial lung disease (ILD), when diagnosis cannot be made based on clinical and radiological assessments [1–4]. Recent reports suggested that TBCB may offer diagnostic value approaching that of surgical lung biopsy [5, 6].
